# Supplementary material for: Antioxidant-substituted tetrapyrazinoporphyrazine as a fluorescent sensor for basic anions
Source: Royal Society of Chemistry journal article supplement (doi:10.1039/c2cc30712j), 2012-01-01
Supplement: c2cc30712j.pdf [file c2cc30712j.pdf]

## Electronic Supplementary Information

# Antioxidant-substituted Tetrapyrazinoporphyrazine as a Turn-on Fluorescence Sensor for Basic Anions

Jonathan P. Hill, Navaneetha K. Subbaiyan, Francis D'Souza, Yongshu Xie, Satyajit Sahu, Noelia M. Sanchez-Ballester, Gary J. Richards, Toshiyuki Mori and Katsuhiko Ariga

### Contents.

|                                                                         |     |
|-------------------------------------------------------------------------|-----|
| <b>1.0.</b> General .....                                               | S2  |
| <b>2.0.</b> Synthesis .....                                             | S2  |
| <b>3.0.</b> X-ray Crystallography .....                                 | S6  |
| <b>3.1.</b> Crystal structure of <b>2</b> .....                         | S8  |
| <b>3.2.</b> Crystal structure of <b>3</b> .....                         | S9  |
| <b>4.0.</b> Molecular model and STM image of <b>1</b> .....             | S10 |
| <b>5.0.</b> Control spectroscopic data for non-phenol derivatives ..... | S11 |
| <b>6.0.</b> UV/Vis titrations with other anions .....                   | S15 |
| <b>7.0.</b> Fluorescence emission titrations with other anions .....    | S16 |
| <b>8.0.</b> Cyclic voltammetry of compound <b>2</b> .....               | S17 |
| <b>9.0.</b> References .....                                            | S18 |

**1.0. General.** Solvents and reagents were obtained from Aldrich Chemical Co., Fischer Chemical Co., Wako Chemical Co., Tokyo Kasei Chemical Co. or Kanto Chemical Co.  $^1\text{H}$  and  $^{13}\text{C}$  NMR spectra were measured at 298 K from  $\text{CDCl}_3$  or  $\text{CDCl}_3/d_6\text{-DMSO}$  solutions of the samples using a JEOL model AL300BX spectrometer with tetramethylsilane as internal standard. Electronic absorption spectra were measured from dichloromethane solutions of the samples using a Shimadzu model UV-3600 UV/Vis/NIR spectrophotometer. FTIR spectra were measured from samples cast on a barium fluoride disc using a Nicolet model 760X FTIR spectrometer. Matrix-assisted laser desorption/ionization time-of-flight mass spectra (MALDI-TOF-MS) were measured using a Shimadzu-Kratos model Axima CFR+ mass spectrometer with dithranol as matrix. Scanning tunneling microscopy (STM) was performed using an Omicron UHV STM. Samples were prepared by dropping a chloroform solution of **1** ( $10^{-9}$  M) onto a gold substrate [Au(111)] and allowing it to evaporate. The sample/substrate was dried in vacuo prior to insertion in the STM vacuum chamber.

## 2.0. Synthesis

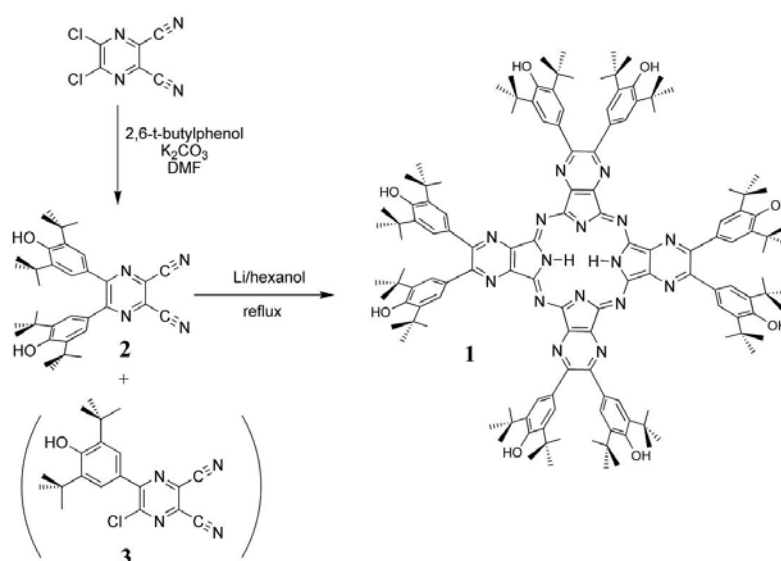

**Scheme S1.** Synthesis of **1**, **2** and **3**.

**5,6-Bis(3,5-di-*t*-butyl-4-hydroxyphenyl)pyrazine-2,3-dicarbonitrile, 2.**

5,6-Dichloro-2,3-dicyanopyrazine (1 g, 0.005 mol) and 2,6-di-*t*-butylphenol (2.5 eq., 2.6 g) were dissolved in N,N-dimethylformamide (50 mL) and the mixture heated to 60 °C. Potassium carbonate (3 g) was gradually added and the suspension heated at 60 °C for 6 hours. The resulting solution was cooled to room temperature, poured into water (100 mL) then extracted with dichloromethane (100 mL × 3). The combined organic fractions were dried (anhydrous Na<sub>2</sub>SO<sub>4</sub>) then the solvents removed under reduced pressure. The residue was purified by column chromatography on silica eluting with dichloromethane:hexane (40%:60%). Yield: 1.81 g, 67% based on 5,6-dichloro-2,3-dicyanopyrazine. UV/Vis (CH<sub>2</sub>Cl<sub>2</sub>): λ<sub>max</sub> = 262, 340, 393 nm. <sup>1</sup>H-NMR (CDCl<sub>3</sub>, 25 °C, 300 MHz): δ = 7.35 (s, 4H, Ar-H), 5.54 (s, 2H, phenolic-H), 1.32 (s, 36H, *t*-butyl-H) ppm. <sup>13</sup>C-NMR (CDCl<sub>3</sub>: 25 °C, 300 MHz): δ = 30.03, 34.33, 113.65, 124.91, 126.95, 128.60, 136.51, 156.17, 156.34 ppm. FT-IR (BaF<sub>2</sub>): ν = 775.84(w), 810.07(w), 887.78(w), 902.61(m), 1024.09(w), 1122.90(m), 1153.31(m), 1207.53(m), 1218.59(m), 1239.90(m), 1254.08(m), 1289.69(w), 1322.59(m), 1370.70(s), 1384.35(m), 1425.01(w), 1443.67(w), 1458.28(w), 1510.70(w), 1596.10(m), 2236.86(w), 2872.98(m), 2950.63(s), 3010.39(w), 3601.95(s) cm<sup>-1</sup>. MALDI-TOF-MS (dithranol): calcd. for C<sub>34</sub>H<sub>43</sub>N<sub>4</sub>O<sub>2</sub> [M + H]<sup>+</sup>: 539.33; found: 539.55.

**5-Chloro-6-(3,5-di-*t*-butyl-4-hydroxyphenyl)pyrazine-2,3-dicarbonitrile (3)** can be a major byproduct of the synthesis of 5,6-bis(3,5-di-*t*-butyl-4-hydroxyphenyl)pyrazine-2,3-dicarbonitrile reaction when not sufficient time is allowed for completion of the reaction. <sup>1</sup>H-NMR (CDCl<sub>3</sub>, 25 °C, 300 MHz): δ = 1.49 (s, 18H, *t*-butyl-H), 5.82 (s, 1H, phenolic-H), 7.84 (s, 2H, Ar-H) ppm. <sup>13</sup>C-NMR (CDCl<sub>3</sub>: 25 °C, 300 MHz): δ = 30.10, 34.51, 112.23, 112.53, 123.76, 127.69, 127.81, 130.55, 136.52, 149.25, 157.01, 157.99 ppm. FT-IR (BaF<sub>2</sub>): ν = 865.02(w), 887.53(w), 895.16(w), 913.05(w), 990.11(w), 1024.79(w), 1105.33(m), 1121.80(m), 1132.04(m), 1146.27(m), 1206.63(m), 1240.40(m), 1272.07(m), 1280.85(m), 1293.42(w), 1307.48(w), 1337.28(m), 1376.84(s), 1405.18(w), 1419.21(w), 1456.52(w), 1492.20(w), 1513.01(m), 1590.30(m), 2240.75(w), 2874.77(m), 2920.23(m), 2962.51(s), 3590.47(s) cm<sup>-1</sup>. MALDI-TOF-MS (dithranol): calcd. for C<sub>20</sub>H<sub>21</sub>ClN<sub>4</sub>O [M]<sup>+</sup>: 368.14 ; found: 368.17.

**2,3,9,10,16,17,23,24-Octakis(3,5-di-*tert*-butyl-4-hydroxyphenyl)-tetrapyrazinoporphyrazine (1).** **1** was prepared according to a literature method<sup>1a,b</sup> using 1-hexanol as the solvent. Samples of **1** are usually contaminated with the mono-hexyloxy-substituted product that could not be removed. UV/Vis (CH<sub>2</sub>Cl<sub>2</sub>): λ<sub>max</sub> = 330, 384, 526, 596, 620, 648, 676 nm. <sup>1</sup>H-NMR (CDCl<sub>3</sub>, 25 °C, 300 MHz): δ = -0.663 (br. s. 2H, NH), 1.49 (s, 144H, *t*-butyl-H), 5.44 (s, 8H, phenolic-H), 7.84 (s, 16H, Ar-H) ppm. <sup>13</sup>C-NMR (CDCl<sub>3</sub>:

25 °C, 300 MHz):  $\delta$  = 30.51, 34.57, 127.26, 128.07, 130.86, 136.22, 146.00, 155.13, 157.80 ppm. FT-IR (BaF<sub>2</sub>):  $\nu$  = 760.35(w), 772.14(w), 810.08(w), 866.91(w), 890.54(w), 1004.25(w), 1023.76(w), 1096.90(w), 1121.21(m), 1121.61(w), 1153.28(m), 1203.88(w), 1224.59(s), 1237.85(s), 1255.61(m), 1289.74(w), 1320.81(w), 1356.35(s), 1392.01(w), 1399.94(w), 1433.60(w), 1458.33(w), 1464.94(w), 1536.66(w), 1599.57(w), 1632.61(m), 1727.53(w), 1737.20(w), 2872.16(m), 2955.00(s), 3000.66(w) 3297.88(w), 3640.36(m) cm<sup>-1</sup>. MALDI-TOF-MS (dithranol): calcd. for C<sub>136</sub>H<sub>170</sub>N<sub>16</sub>O<sub>8</sub> [M + 6H]<sup>+</sup>: 2161.38; found: 2161.29.

#### Non-phenolic control compounds.

**5,6-Diphenylpyrazine-2,3-dicarbonitrile**<sup>2</sup> was synthesized according to the method used by Ohta et al.<sup>3</sup> UV/Vis (CH<sub>2</sub>Cl<sub>2</sub>):  $\lambda_{\text{max}}$  = nm. <sup>1</sup>H-NMR (CDCl<sub>3</sub>, 25 °C, 300 MHz):  $\delta$  = 7.36 (t, 4H, <sup>3</sup>J = 7.4 Hz, phenyl *meta*-H), 7.46 (t, 2H, <sup>3</sup>J = 7.3 Hz, phenyl *para*-H), 7.53 (d, 4H, <sup>3</sup>J = 7.5 Hz, phenyl *ortho*-H ppm. <sup>13</sup>C-NMR (CDCl<sub>3</sub>: 25 °C, 300 MHz):  $\delta$  = 113.13, 128.86, 129.86, 131.15, 135.34, 155.39 ppm.

**2,3,9,10,16,17,23,24-Octaphenyltetrapyrazinoporphyrazine, 1**, was synthesized from 5,6-diphenylpyrazine-2,3-dicarbonitrile using literature methods.<sup>1,4</sup>

### 3.0. X-ray crystallography

Crystals of **2** suitable for X-ray diffraction were grown by refrigerating a dichloromethane/hexane (40:60) solution of **2** at  $-20\text{ }^{\circ}\text{C}$ . Crystals of **3** were grown by slow evaporation of a dichloromethane solution. X-ray data for **2** and **3** were collected at 180 K on a Bruker SMART APEX diffractometer using graphite-monochromated MoK $\alpha$  radiation. Structure solutions by direct methods and full-matrix least-squares refinement against  $F^2$  (all data) were carried out using the SHELXTL package.<sup>5</sup> All ordered non-H atoms were refined anisotropically. Crystallographic data (excluding structure factors) for the structures in this paper have been deposited with the Cambridge Crystallographic Data Centre as supplementary publication nos. CCDC 864529 & 864530. Copies of the data can be obtained, free of charge, on application to CCDC, 12 Union Road, Cambridge CB2 1EZ, UK: <http://www.ccdc.cam.ac.uk/cgi-bin/catreq.cgi>, e-mail: [data\\_request@ccdc.cam.ac.uk](mailto:data_request@ccdc.cam.ac.uk), or fax: +44 1223 336033.

X-ray Crystallography data for **2**: C<sub>34</sub>H<sub>42</sub>N<sub>4</sub>O<sub>2</sub>, M = 538.72 g/mol, space group P 43 21 2,  $a = 15.9922(12)$ ,  $b = 15.9922(12)$ ,  $c = 12.4393(19)$  Å,  $\alpha = 90.00^{\circ}$ ,  $V = 3181.36(59)$  Å<sup>3</sup>,  $Z = 4$ ,  $\rho_{\text{calcd}} = 1.125\text{ mg/m}^3$ ,  $\mu(\text{MoK}\alpha) = 0.070\text{ mm}^{-1}$ , 25867 reflections measured, 1997 were unique (Rint. 0.0271); refinement against  $F^2$  to  $wR^2$ :

0.1176,  $R_1 = 0.0473$  (1855 reflections with  $I > 2\sigma(I)$ ), goodness of fit  $S = 1.074$ , 193 parameters.

X-ray Crystallography data for **3**:  $C_{20}H_{21}ClN_4O$ ,  $M = 368.86$  g/mol, space group  $P 2(1)/m$ ,  $a = 10.639(5)$ ,  $b = 6.969(3)$ ,  $c = 13.260(6)$  Å,  $\alpha = \gamma = 90.00^\circ$ ,  $\beta = 109.394(7)^\circ$ ,  $V = 927.3(7)$  Å<sup>3</sup>,  $Z = 2$ ,  $\rho_{\text{calcd}} = 1.321$  mg/m<sup>3</sup>,  $\mu(\text{MoK}\alpha) = 0.070$  mm<sup>-1</sup>, 7235 reflections measured, 2040 were unique ( $R_{\text{int}} = 0.0289$ ); refinement against  $F^2$  to  $wR_2 = 0.1290$ ,  $R_1 = 0.0499$  (1574 reflections with  $I > 2\sigma(I)$ ), goodness of fit  $S = 1.027$ , 155 parameters, 1 restraint.

### 3.1. Crystal structure of **2**

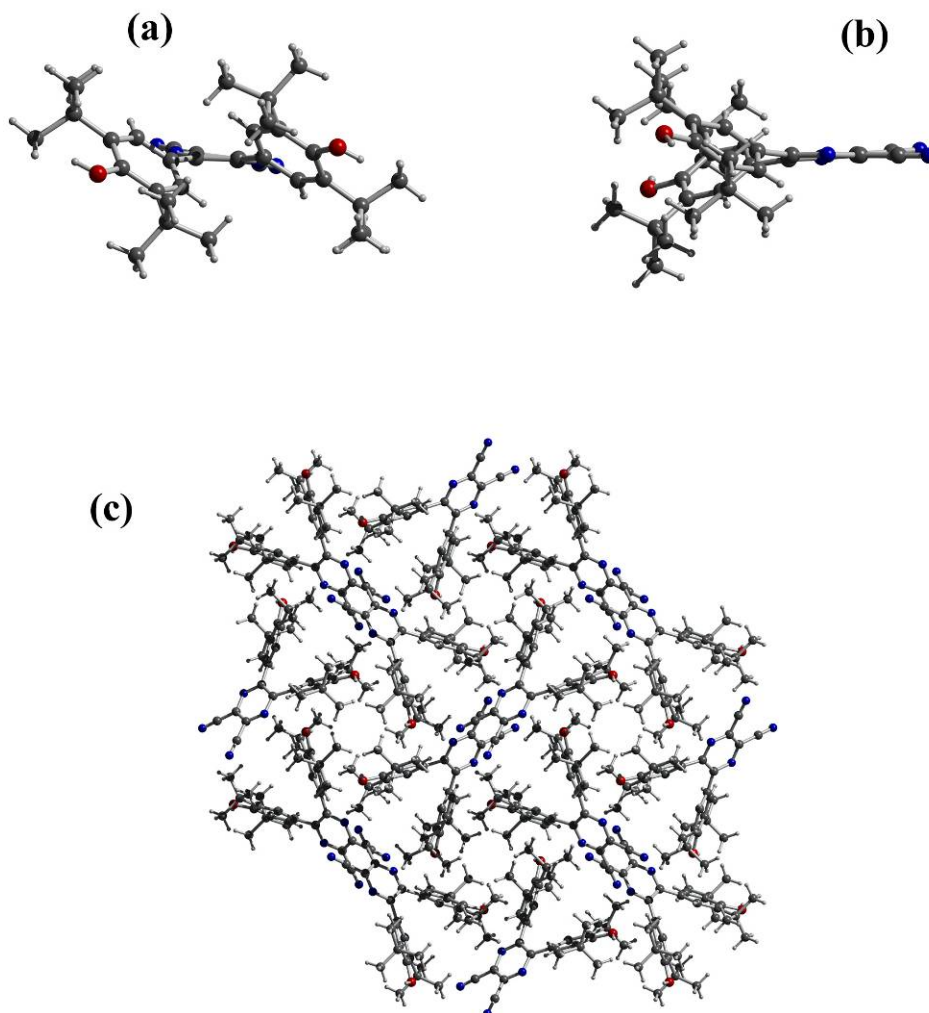

**Figure S1.** X-ray crystal structure of 5,6-Bis(3,5-di-*t*-butyl-4-hydroxyphenyl)pyrazine-2,3-dicarbonitrile **2**. (a) View showing the non-coplanarity of the phenyl substituents. (b) Viewed edge-on. The pyrazine-2,3-dicarbonitrile unit is slightly distorted from planarity. (c) Packing diagram of **2** viewed along the *c*-axis.



### 3.2. Crystal structure of **3**

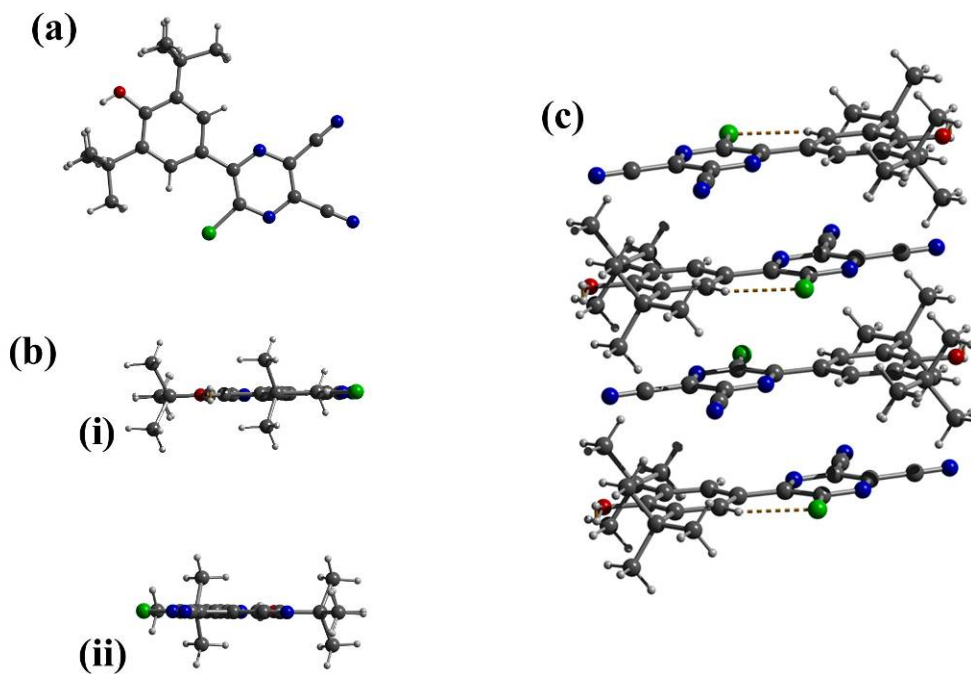

**Figure S2.** X-ray crystal structure of 5-Chloro-6-(3,5-di-*t*-butyl-4-hydroxyphenyl)pyrazine-2,3-dicarbonitrile, **3**. (a) Single molecule **3**. An intramolecular H-bonding interaction between 5-chloro atom and phenyl substituent leads to coplanarity of the two six-membered rings. (b) Edge-on views of **3** emphasizing the coplanarity: (i) viewed remote from nitrile groups; (ii) viewed from the direction of the nitrile groups. (c) A stack of **3** within the structure where directions of the molecular long axes alternate. Stacking is made possible by the H-bonding induced coplanarity of **3**.

#### 4.0. Molecular model and STM image of **1**.

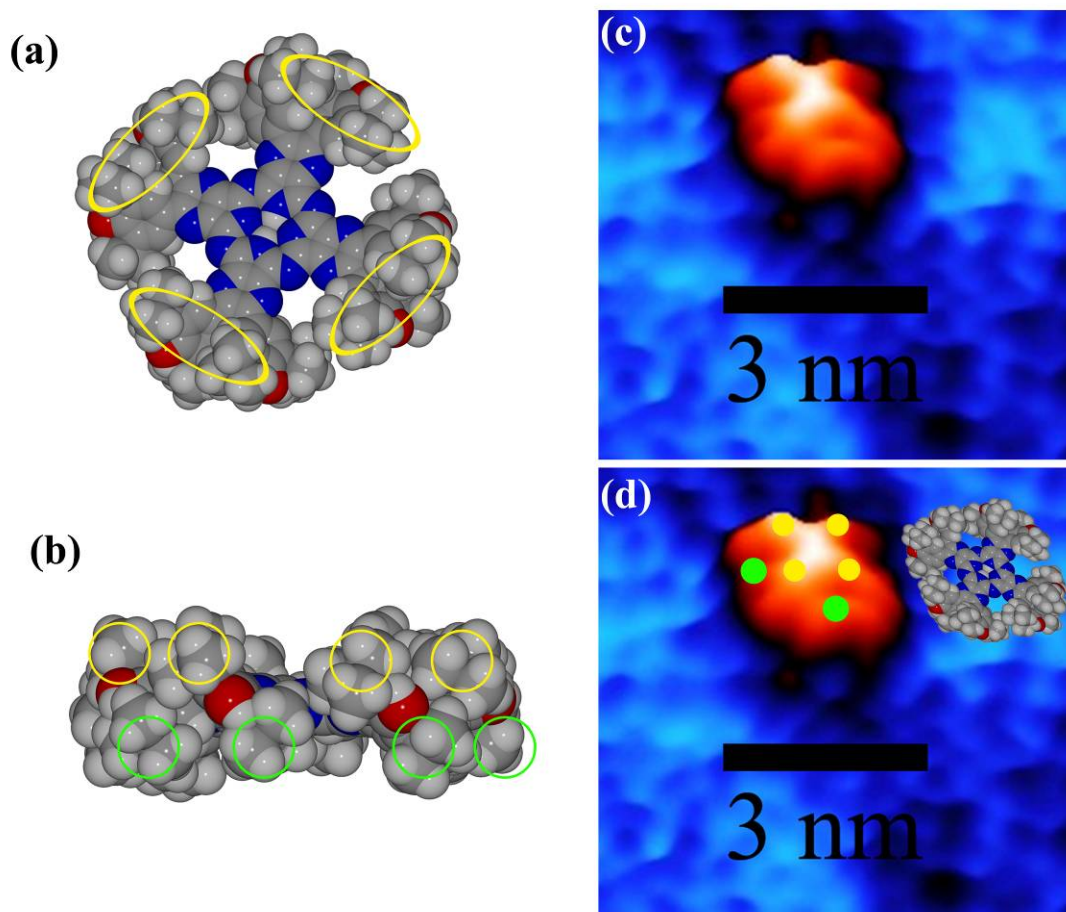

**Figure S3.** Molecular model of **1** and STM image. (a) Energy minimized structure of **1** (MM2, generated using the Chemdraw3D program). Yellow ellipses indicate the positions of t-butyl groups at the upper rim of the molecule. (b) Edge view of **1** with 'upper' and 'lower' t-butyl groups indicated. (c,d) STM image of **1**. In (d) positions of each type of t-butyl groups are indicated by spots of the same colour as given in (b). A model structure of **1** is also shown in (c) illustrating its approximate positioning.

## 5.0. Control spectroscopic data for non-phenol derivatives

**5,6-Diphenylpyrazine-2,3-dicarbonitrile and 2,3,9,10,16,17,23,24-Octaphenyltetra  
pyrazinoporphyrazine.**

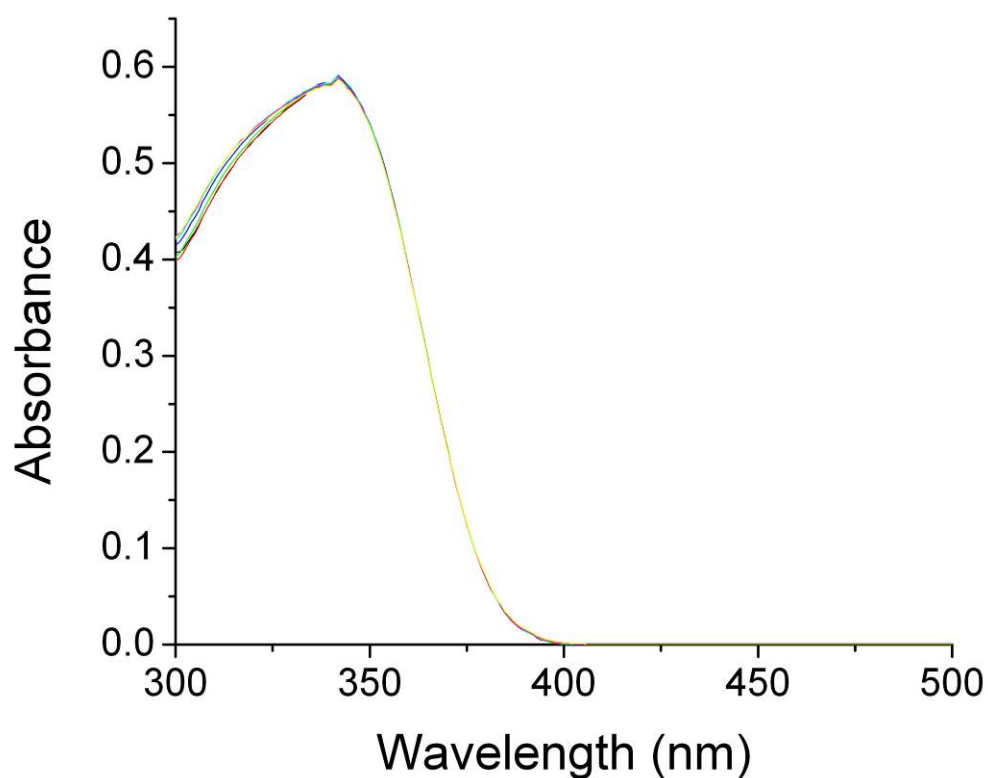

**Figure S4.** Electronic absorption spectra of 5,6-diphenylpyrazine-2,3-dicarbonitrile in benzonitrile containing increasing amounts of fluoride anion. Almost no variation is observed at any concentration of fluoride anions.

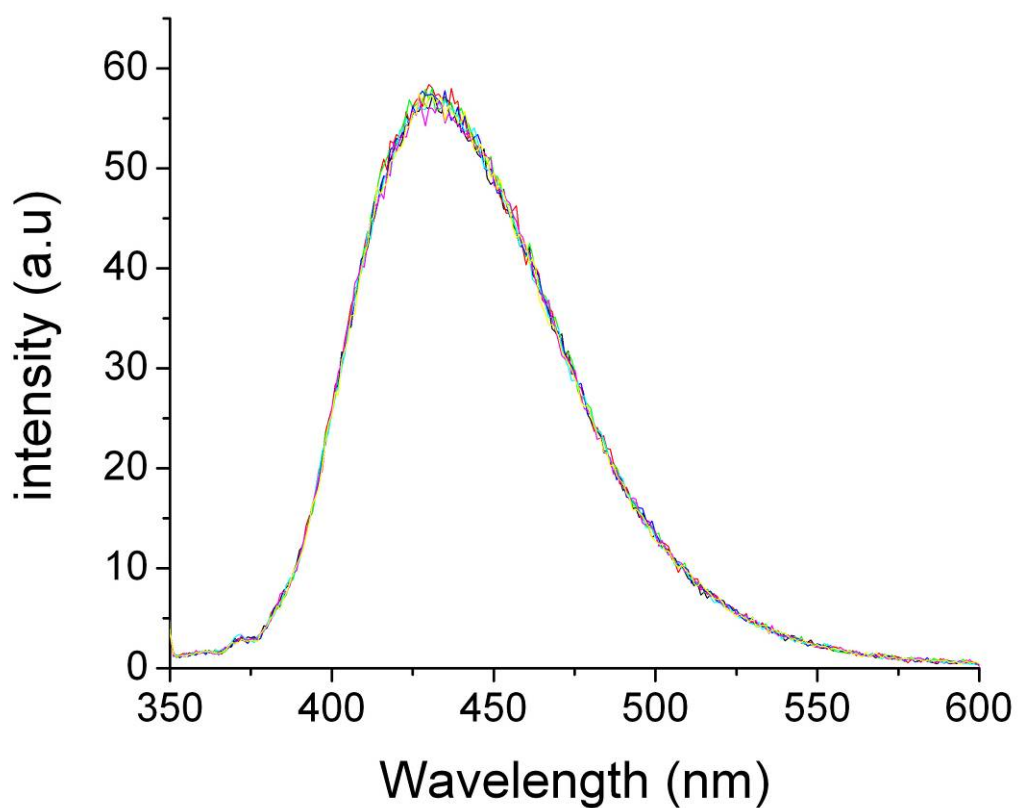

**Figure S5.** Fluorescence emission (excitation wavelength: 344 nm) spectra of 5,6-diphenylpyrazine-2,3-dicarbonitrile in benzonitrile containing increasing amounts of fluoride anion. Almost no variation is observed at any concentration of fluoride anions.

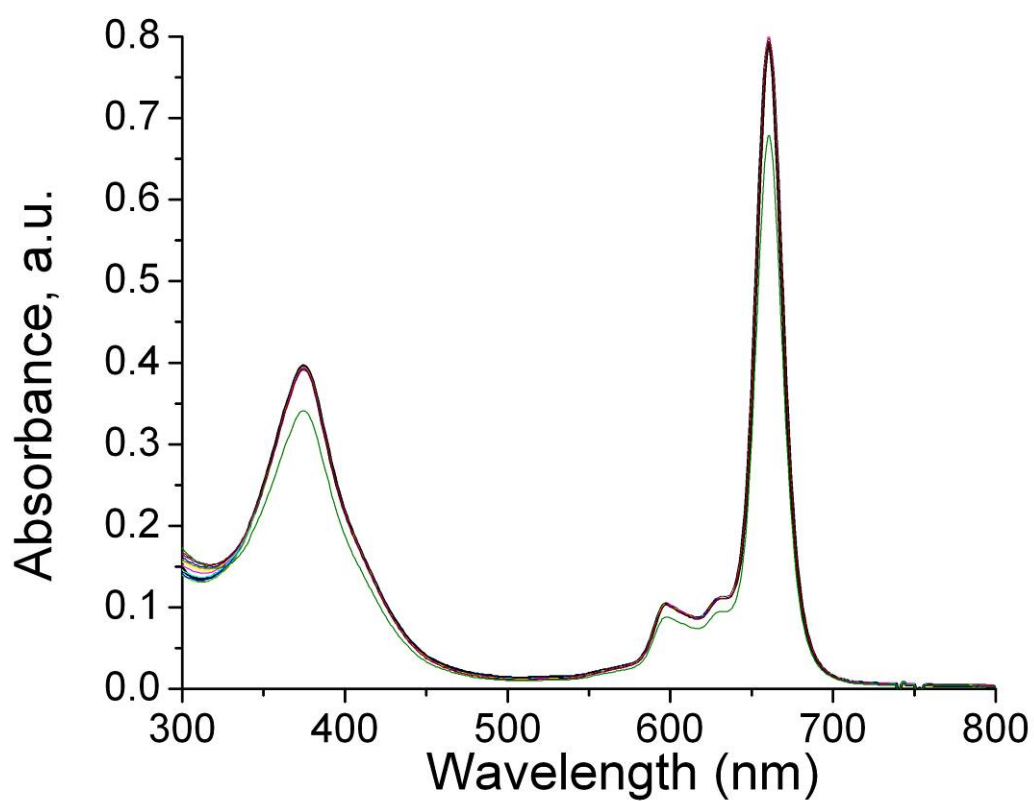

**Figure S6.** Electronic absorption spectra of 2,3,9,10,16,17,23,24-octaphenyl tetrapyrzino porphyrazine in benzonitrile containing increasing amounts of fluoride anion. Almost no variation is observed at any concentration of fluoride anions.

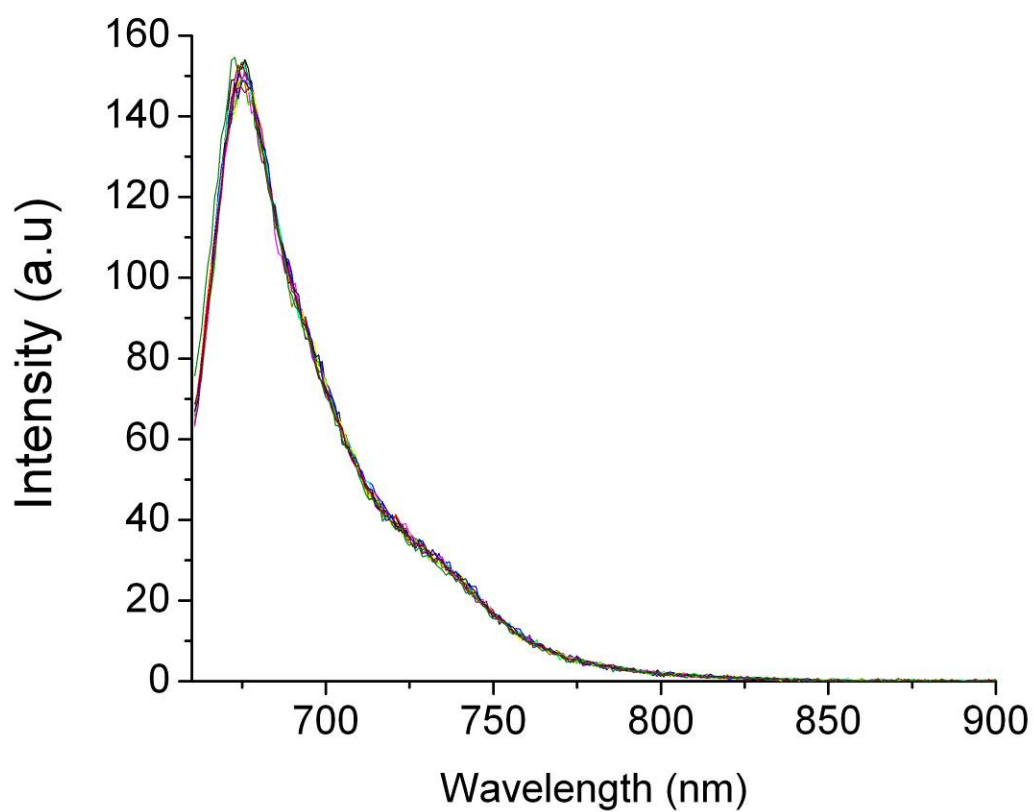

**Figure S7.** Fluorescence emission (excitation wavelength: 660 nm) spectra of 2,3,9,10,16,17,23,24-octaphenyl tetrapyrazinoporphyrazine in benzonitrile containing increasing amounts of fluoride anion. Almost no variation is observed at any concentration of fluoride anions.

## 6.0. UV/Vis titrations with other anions.

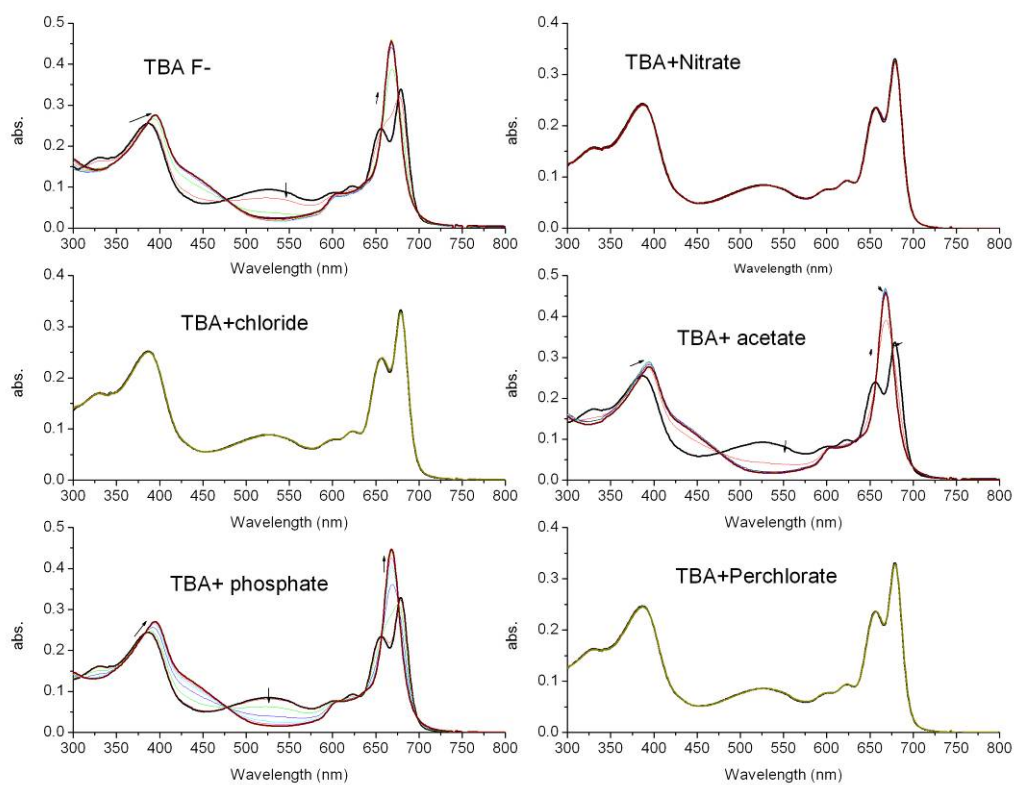

**Figure S8.** Changes in electronic absorption spectra during titration of solutions of **1** in benzonitrile with the indicated anions.

## 7.0. Fluorescence emission titrations with other anions.

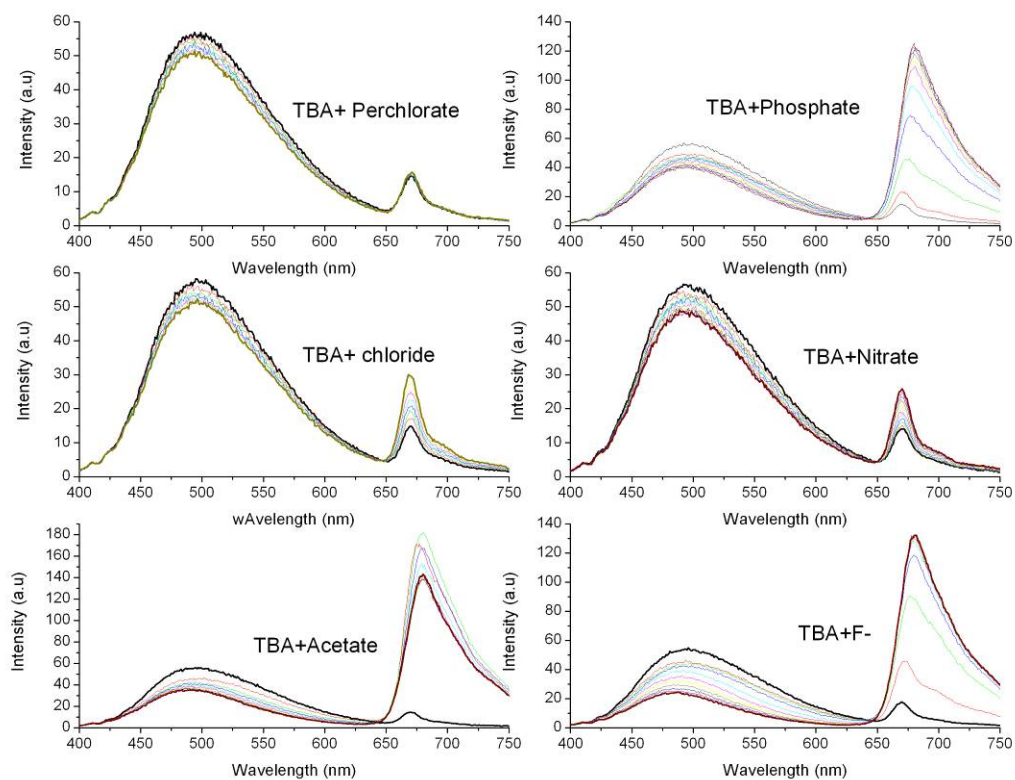

**Figure S9.** Changes in fluorescence emission spectra during titration of solutions of **1** in benzonitrile with the indicated anions.



## 8.0 Cyclic voltammetry of compound 2.

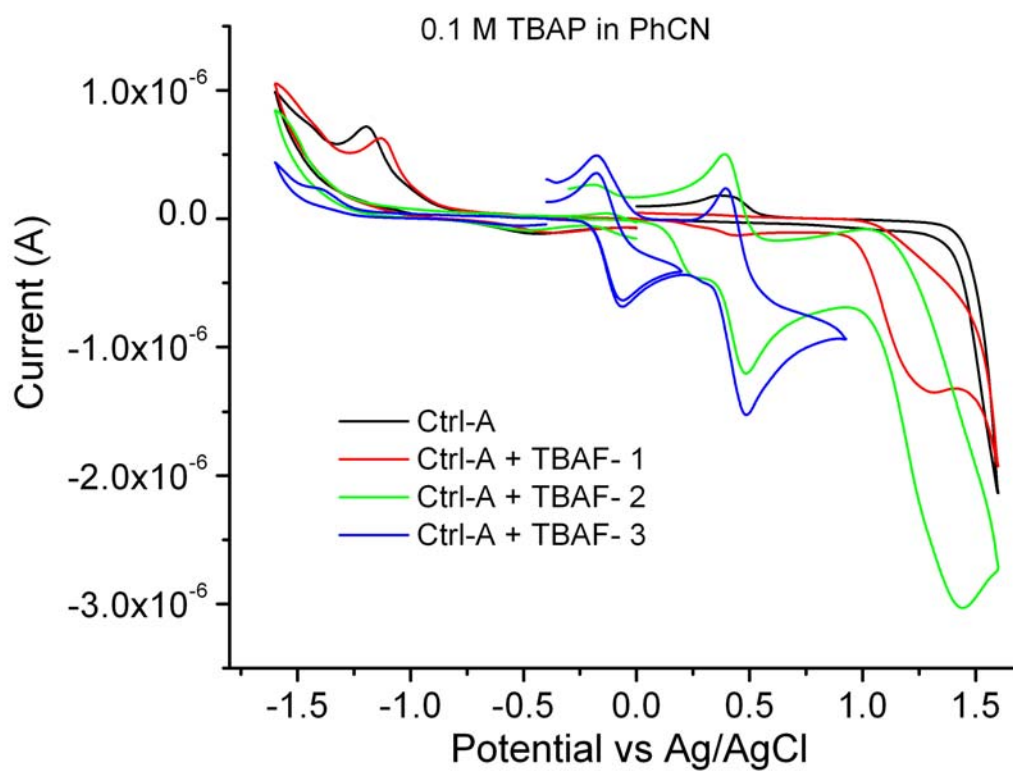

**Figure S10.** Cyclic voltammograms of **2** revealing eventual emergence of two reversible oxidations in the presence of fluoride anions probably due to oxidation to a quinonoid state.

## 9.0. References

- 1 (a) S. Makhseed, F. Ibrahim, C. G. Bezzu and N. B. McKeown, *Tetrahedron Lett.*, 2007, **48**, 7358. (b) G. J. Clarkson, P. Humberstone and N. B. McKeown, *Chem. Commun.*, 1997, 1979
- 2 (a) H. W. Rothkopf, D. Wöhrle, R. Müller and G. Koßmehl, *Chem. Ber.*, 1975, **108**, 875. (b) T. Hökelek, E. Yalçın, Z. Seferoğlu and E. Şahin, *Acta Cryst.*, 2009, **E65**, o2225.
- 3 K. Ohta, S. Azumane, W. Kawahara, N. Kobayashi and I. Yamamoto, *J. Mater. Chem.*, 1999, **9**, 2313.
- 4 M. G. Gal'pern, S. V. Kudrevich and I. G. Novozhilova, *Chem. Heterocycl. Comp.*, 1993, **29**, 49.
- 5 G. M. Sheldrick, *SHELXTL* 6.14, Bruker AXS, Inc., 6300 Enterprise Lane, Madison, WI 53719-1173, USA, 2003.
